# Supplementary material
Source: PubMed Central journal article supplement (PMC4135465)
Supplement: NIHMS611930-supplement-01.pdf [file NIHMS611930-supplement-01.pdf]

## Supplementary Data

|                  |  | Food intake (g per day and mouse) |          |          |          |          |          |          |          |
|------------------|--|-----------------------------------|----------|----------|----------|----------|----------|----------|----------|
|                  |  | Control diet                      |          |          |          | TRO diet |          |          |          |
| Age (months)     |  | 1                                 | 2        | 3        | 4        | 1        | 2        | 3        | 4        |
| <b>TRO19622</b>  |  |                                   |          |          |          |          |          |          |          |
| <b>high dose</b> |  | 3.6±0.13                          | 3.3±0.14 | 3.6±0.14 | 3.8±0.16 | 3.5±0.12 | 3.5±0.17 | 3.7±0.12 | 4.0±0.22 |
| <b>TRO19622</b>  |  |                                   |          |          |          |          |          |          |          |
| <b>low dose</b>  |  | 3.7±0.15                          | 3.6±0.15 | 3.6±0.15 | 4.2±0.18 | 3.6±0.14 | 3.8±0.14 | 3.8±0.12 | 4.0±0.17 |
| <b>TRO40303</b>  |  |                                   |          |          |          |          |          |          |          |
| <b>high dose</b> |  | 4.1±0.16                          | 3.9±0.25 | 4.0±0.14 | 4.4±0.20 | 4.3±0.17 | 4.5±0.19 | 3.8±0.21 | 4.1±0.25 |
| <b>TRO40303</b>  |  |                                   |          |          |          |          |          |          |          |
| <b>low dose</b>  |  | 4.4±0.20                          | 4.3±0.17 | 4.5±0.24 | 4.3±0.21 | 4.6±0.17 | 3.9±0.13 | 4.3±0.23 | 4.6±0.25 |

**Table S1:** Daily food intake of mice (wildtype and Thy1-aSyn housed together) during treatment with control diet or diet with TRO compounds over 3 months (1-4 months of age). No significant differences in food intake between TRO treated and control diet treated mice (2x4 ANOVA, mean±SEM). N=19-21 per group.

|                               |        | Age (months)     |                  |                                      |
|-------------------------------|--------|------------------|------------------|--------------------------------------|
|                               |        | 2                | 3                | 4                                    |
| <b>TRO19622<br/>high dose</b> | Plasma | 11.17 ± 0.27 (1) | 11.64 ± 3.60 (1) | 15 ± 2.52 (1)<br>14.24 ± 2.21 (2)    |
|                               | Brain  | 3.74 ± 0.48 (1)  | 3.29 ± 0.21 (1)  | 3.37 ± 0.48 (1)<br>3.73 ± 0.30 (2)   |
| <b>TRO19622<br/>low dose</b>  | Plasma | 1.89 ± 0.27 (1)  | 2.34 ± 0.28 (1)  | 1.41 ± 0.14 (1)<br>1.42 ± 0.16 (2)   |
|                               | Brain  | 0.52 ± 0.05 (1)  | 0.48 ± 0.13 (1)  | 0.40 ± 0.06 (1)<br>0.43 ± 0.06 (2)   |
| <b>TRO40303<br/>high dose</b> | Plasma | 4.04 ± 0.33 (1)  | 5.79 ± 0.08 (1)  | 4.04 ± 0.55 (1)<br>4.52 ± 0.43 (2)   |
|                               | Brain  | 1.01 ± 0.05 (1)  | 1.22 ± 0.12 (1)  | 0.81 ± 0.09 (1)<br>0.89 ± 0.07 (2)   |
| <b>TRO40303<br/>low dose</b>  | Plasma | 0.14 ± 0.003 (1) | 0.32 ± 0.04 (1)  | 0.31 ± 0.05 (1)<br>0.20 ± 0.03 (2)   |
|                               | Brain  | 0.14 ± 0.06 (1)  | 0.19 ± 0.02 (1)  | 0.11 ± 0.012 (1)<br>0.08 ± 0.017 (2) |

**Table S2:** Plasma and brain levels in mice fed with food pellets enriched with TRO19622 or TRO40303 high or low dosages. TRO19622 and TRO40303 plasma ( $\mu\text{g/ml}$ ) and brain ( $\mu\text{g/g}$ ) levels at 2, 3, 4 months of age (1, 2, 3 months of drug administration, respectively). Values are means  $\pm$  SEM of 3 to 5 mice. (1): wild type mice, (2): Thy1-aSyn mice

|                    |  | Body Weight (g) |          |         |          |          |          |           |           |
|--------------------|--|-----------------|----------|---------|----------|----------|----------|-----------|-----------|
|                    |  | Control diet    |          |         |          | TRO diet |          |           |           |
| Age                |  | 1               | 2        | 3       | 4        | 1        | 2        | 3 months  | 4 months  |
|                    |  | month           | months   | months  | months   | months   | months   |           |           |
| TRO19622 high dose |  |                 |          |         |          |          |          |           |           |
| <b>WT</b>          |  | 17±0.42         | 28±0.86  | 33±1.23 | 36±1.25  | 17±0.50  | 28±0.89  | 33±1.18   | 37±1.27   |
| <b>Thy1</b>        |  | 16±0.41         | 25±0.61  | 29±0.82 | 30±0.98  | 16±0.49  | 25±0.61  | 29±0.76   | 32±1.04#  |
| TRO19622 low dose  |  |                 |          |         |          |          |          |           |           |
| <b>WT</b>          |  | 15±0.57         | 28±0.79  | 32±0.96 | 35±0.95  | 16±0.36  | 29±0.73  | 35±1.01   | 37±0.99   |
| <b>Thy1</b>        |  | 15±0.69         | 25±0.69  | 27±1.00 | 30±1.04  | 16±0.43  | 27±0.49# | 31±0.83#  | 33±0.80#  |
| TRO40303 high dose |  |                 |          |         |          |          |          |           |           |
| <b>WT</b>          |  | 16±0.60         | 29±0.77  | 35±0.98 | 38±1.25  | 16±0.60  | 29±0.85  | 33±1.12   | 35±1.53   |
| <b>Thy1</b>        |  | 16±0.45         | 27±0.68  | 31±0.85 | 34±1.01  | 15±0.97  | 26±0.99  | 28±0.99## | 30±1.05## |
| TRO40303 low dose  |  |                 |          |         |          |          |          |           |           |
| <b>WT</b>          |  | 17±0.52         | 26 ±0.92 | 36±0.82 | 36 ±1.05 | 17 ±0.59 | 28 ±0.70 | 35 ±0.95  | 36 ±0.92  |
| <b>Thy1</b>        |  | 17±0.42         | 27 ±0.65 | 32±0.86 | 33 ±0.92 | 17 ±0.46 | 26±0.44  | 30±0.73   | 31±0.61## |

**Table S3 Effect of TRO19622 and TRO40303 on body weight:** Body weight in wildtype (WT) and Thy1-aSyn (Thy1) mice at the beginning of the experiment (1 month of age) and following 3 months of treatment with TRO or control diet (up to 4 months of age). #p<0.05, ## p<0.01 compared to respective control-treated group (mean ± SEM, 2X2X4 ANOVA followed by Fisher's LSD). N=17-22 per group.

**Tables S4-S10 (lists of genes and gene ontology), excel files**

| Genotype            | WT                 |                    |                      |                      | Thy1- $\alpha$ Syn   |                       |                      |                       |
|---------------------|--------------------|--------------------|----------------------|----------------------|----------------------|-----------------------|----------------------|-----------------------|
|                     | 1 months           |                    | 3 months             |                      | 1 months             |                       | 3 months             |                       |
| Treatment           | control            | 19622 low          | control              | 19622 low            | control              | 19622 low             | control              | 19622 low             |
| Errors per steps    | 0.11<br>$\pm$ 0.02 | 0.10<br>$\pm$ 0.01 | 0.09<br>$\pm$ 0.02   | 0.08<br>$\pm$ 0.01   | 0.38##<br>$\pm$ 0.03 | 0.46*##<br>$\pm$ 0.02 | 0.48^^<br>$\pm$ 0.04 | 0.6**^^<br>$\pm$ 0.05 |
| Pole (turn in sec)  | 3.39<br>$\pm$ 1.03 | 2.38<br>$\pm$ 0.46 | 8.85^^<br>$\pm$ 2.11 | 9.10^^<br>$\pm$ 1.95 | 14.8##<br>$\pm$ 2.13 | 28.3##<br>$\pm$ 4.35  | 23.6^^<br>$\pm$ 1.68 | 47.1^<br>$\pm$ 3.23   |
| Pole (total in sec) | 7.61<br>$\pm$ 1.99 | 5.69<br>$\pm$ 0.77 | 17.6<br>$\pm$ 4.16   | 17.6<br>$\pm$ 3.63   | 19.8##<br>$\pm$ 2.26 | 38.4##<br>$\pm$ 4.47  | 25.0^^<br>$\pm$ 1.74 | 49.7^<br>$\pm$ 3.53   |

  

| Genotype            | WT                 |                    |                     |                      | Thy1- $\alpha$ Syn   |                      |                    |                       |
|---------------------|--------------------|--------------------|---------------------|----------------------|----------------------|----------------------|--------------------|-----------------------|
|                     | 1 months           |                    | 3 months            |                      | 1 months             |                      | 3 months           |                       |
| Treatment           | control            | 19622 high         | control             | 19622 high           | control              | 19622 high           | control            | 19622 high            |
| Errors per steps    | 0.06<br>$\pm$ 0.01 | 0.07<br>$\pm$ 0.01 | 0.11^<br>$\pm$ 0.02 | 0.05**<br>$\pm$ 0.01 | 0.44##<br>$\pm$ 0.03 | 0.40##<br>$\pm$ 0.03 | 0.43<br>$\pm$ 0.03 | 0.51*^^<br>$\pm$ 0.03 |
| Pole (turn in sec)  | 3.11<br>$\pm$ 0.90 | 2.24<br>$\pm$ 0.32 | 5.06^<br>$\pm$ 1    | 3.68<br>$\pm$ 0.74   | 15.1##<br>$\pm$ 2.44 | 14.8##<br>$\pm$ 2.03 | 21<br>$\pm$ 1.53   | 24.9^^<br>$\pm$ 1.39  |
| Pole (total in sec) | 6.65<br>$\pm$ 1.28 | 5.52<br>$\pm$ 0.48 | 10.22<br>$\pm$ 1.89 | 7.44<br>$\pm$ 1.32   | 29.2##<br>$\pm$ 5.17 | 27.8##<br>$\pm$ 5.17 | 39.9<br>$\pm$ 3.77 | 47.1^^<br>$\pm$ 4.15  |

  

| Genotype            | WT                 |                    |                     |                    | Thy1- $\alpha$ Syn   |                      |                      |                      |
|---------------------|--------------------|--------------------|---------------------|--------------------|----------------------|----------------------|----------------------|----------------------|
|                     | 1 months           |                    | 3 months            |                    | 1 months             |                      | 3 months             |                      |
| Treatment           | control            | 40303 low          | control             | 40303 low          | control              | 40303 low            | control              | 40303 low            |
| Errors per steps    | 0.18<br>$\pm$ 0.04 | 0.15<br>$\pm$ 0.01 | 0.15<br>$\pm$ 0.01  | 0.2<br>$\pm$ 0.03  | 0.58##<br>$\pm$ 0.02 | 0.53##<br>$\pm$ 0.04 | 0.66<br>$\pm$ 0.03   | 0.67^^<br>$\pm$ 0.05 |
| Pole (turn in sec)  | 5.25<br>$\pm$ 1.44 | 4.48<br>$\pm$ 1.28 | 7.66<br>$\pm$ 1.56  | 5.33<br>$\pm$ 1.72 | 21.6##<br>$\pm$ 2.06 | 20.3##<br>$\pm$ 1.45 | 26.2^<br>$\pm$ 1.4   | 23.5<br>$\pm$ 1.74   |
| Pole (total in sec) | 11.1<br>$\pm$ 2.82 | 8.26<br>$\pm$ 2.51 | 15.6^<br>$\pm$ 2.94 | 11.0<br>$\pm$ 3.38 | 41.7##<br>$\pm$ 4.35 | 39.6##<br>$\pm$ 3.12 | 51.8^^<br>$\pm$ 2.90 | 46.3<br>$\pm$ 3.62   |

  

| Genotype            | WT                 |                    |                     |                      | Thy1- $\alpha$ Syn   |                      |                      |                        |
|---------------------|--------------------|--------------------|---------------------|----------------------|----------------------|----------------------|----------------------|------------------------|
|                     | 1 months           |                    | 3 months            |                      | 1 months             |                      | 3 months             |                        |
| Treatment           | control            | 40303 high         | control             | 40303 high           | control              | 40303 high           | control              | 40303 high             |
| Errors per steps    | 0.14<br>$\pm$ 0.01 | 0.19<br>$\pm$ 0.01 | 0.17<br>$\pm$ 0.02  | 0.16<br>$\pm$ 0.02   | 0.61##<br>$\pm$ 0.03 | 0.65##<br>$\pm$ 0.04 | 0.63<br>$\pm$ 0.03   | 0.87**^^<br>$\pm$ 0.04 |
| Pole (turn in sec)  | 4.89<br>$\pm$ 1.37 | 2.13<br>$\pm$ 0.37 | 7.22^<br>$\pm$ 1.17 | 8.16^^<br>$\pm$ 1.76 | 16.9## $\pm$<br>2.02 | 18.1##<br>$\pm$ 1.93 | 23.65^<br>$\pm$ 1.83 | 26.9^^<br>$\pm$ 1.29   |
| Pole (total in sec) | 10.1<br>$\pm$ 2.64 | 5.03<br>$\pm$ 0.69 | 13.3<br>$\pm$ 2.27  | 15.9^^<br>$\pm$ 3.47 | 32.6##<br>$\pm$ 3.99 | 34.5##<br>$\pm$ 3.88 | 47.1^^<br>$\pm$ 3.72 | 53.2^^<br>$\pm$ 2.84   |

**Table S11 Effect of TRO compounds on motor skills.** Errors per step were recorded on the challenging beam test. For the pole test, mice were placed snout up on top of a vertical pole and time to turn upside down and total time from beginning of the test to reaching the floor were measured. Mean of five trials, SEM; ##p<0.01 compared to wildtype (WT) (transgene effect, only shown for 1 month treatment, but also present after 3 months treatment), \*p<0.05, \*\*p<0.01 compared to control diet (drug effect after 1 or 3 months of treatment), ^p<0.05, ^^p< 0.01 compared to 1 month treatment (progression of transgene effect); 2x2x2 ANOVA followed by Fisher's LSD for errors per step, Mann Whitney U and Wilcoxon signed rank test for pole test, n=16-20 per group.

|                           |                | Wildtype     |              | Thy1-aSyn      |                |
|---------------------------|----------------|--------------|--------------|----------------|----------------|
|                           |                | Control diet | TRO diet     | Control diet   | TRO diet       |
| <b>TRO19622 high dose</b> |                |              |              |                |                |
| <b>Activity</b>           | <b>FLSteps</b> | 69.45 ± 5.51 | 63.95 ± 3.51 | 41.90** ± 3.39 | 40.8** ± 3.54  |
|                           | <b>HLSteps</b> | 41.90 ± 4.65 | 44.35 ± 3.67 | 10.05** ± 2.26 | 7.8** ± 1.52   |
| <b>TRO19622 low dose</b>  |                |              |              |                |                |
| <b>Activity</b>           | <b>FLSteps</b> | 54.35 ± 5.29 | 55.59 ± 4.11 | 36.80* ± 4.32  | 37.45** ± 2.86 |
|                           | <b>HLSteps</b> | 50.60 ± 5.24 | 45.68 ± 4.31 | 10.70** ± 2.56 | 8.20** ± 1.67  |
| <b>TRO40303 high dose</b> |                |              |              |                |                |
| <b>Activity</b>           | <b>FLSteps</b> | 37.63 ± 2.36 | 36.05 ± 2.82 | 37 ± 4.68      | 40.10 ± 3.62   |
|                           | <b>HLSteps</b> | 25.13 ± 3.50 | 26.62 ± 2.97 | 6.83** ± 1.30  | 12.15** ± 1.95 |
| <b>TRO40303 low dose</b>  |                |              |              |                |                |
| <b>Activity</b>           | <b>FLSteps</b> | 51.50 ± 3.95 | 50.63 ± 3.38 | 43.70 ± 3.41   | 41.24 ± 2.59   |
|                           | <b>HLSteps</b> | 43 ± 4.68    | 43.89 ± 4.51 | 11.85** ± 1.90 | 9.52** ± 1.54  |

**Table S12 Effect of TRO compounds on spontaneous activity.** Effect of 3 months TRO19622 and TRO40303 administration on spontaneous activity in the cylinder test. WT (control diet=18-20, TRO19622=16, TRO40303=19) and Thy1-aSyn (control diet=19-20, TRO19622=18, TRO40303=19) mice treated with TRO19622 or TRO40303 at high or low dose compared to respective control groups treated with control diet. \*\*p<0.01 Thy1-aSyn control diet compared to WT control diet, (transgene effect, 2x2x2 ANOVA, Fisher's LSD, mean ± SEM). FLSteps= forelimb steps, HLSteps=hindlimb steps.

|                         | control diet                        |                     | TRO diet                            |                     |
|-------------------------|-------------------------------------|---------------------|-------------------------------------|---------------------|
|                         | number<br>(n/ 100 $\mu\text{m}^2$ ) | area covered<br>(%) | number<br>(n/ 100 $\mu\text{m}^2$ ) | area covered<br>(%) |
| <b>TRO40303 high dl</b> | 0.46 ± 0.020                        | 1.29 ± 0.077        | 0.48 ± 0.036                        | 1.32 ± 0.142        |
| <b>TRO40303 high dm</b> | 0.44 ± 0.019                        | 1.04 ± 0.063        | 0.38 ± 0.036                        | 0.98 ± 0.061        |
| <b>TRO40303 high vl</b> | 0.50 ± 0.022                        | 1.46 ± 0.030        | 0.52 ± 0.027                        | 1.57 ± 0.161        |
| <b>TRO40303 high vm</b> | 0.51 ± 0.032                        | 1.49 ± 0.126        | 0.54 ± 0.030                        | 1.55 ± 0.124        |
| <b>TRO19622 high dl</b> | 0.48 ± 0.047                        | 0.61 ± 0.099        | 0.61 ± 0.027*                       | 0.96 ± 0.087*       |
| <b>TRO19622 high dm</b> | 0.40 ± 0.043                        | 0.46 ± 0.060        | 0.42 ± 0.044                        | 0.51 ± 0.072        |
| <b>TRO19622 high vl</b> | 0.53 ± 0.030                        | 0.81 ± 0.070        | 0.61 ± 0.034                        | 1.11 ± 0.097*       |
| <b>TRO19622 high vm</b> | 0.51 ± 0.031                        | 0.71 ± 0.055        | 0.59 ± 0.035                        | 0.99 ± 0.008*       |
| <b>TRO19622 low dl</b>  | 0.61 ± 0.099                        | 0.43 ± 0.060        | 0.96 ± 0.087                        | 0.44 ± 0.024        |
| <b>TRO19622 low dm</b>  | 0.46 ± 0.060                        | 0.39 ± 0.053        | 0.51 ± 0.072                        | 0.38 ± 0.029        |
| <b>TRO19622 low vl</b>  | 0.81 ± 0.070                        | 0.40 ± 0.056        | 1.11 ± 0.097                        | 0.48 ± 0.016        |
| <b>TRO19622 low vm</b>  | 0.51 ± 0.031                        | 0.41 ± 0.043        | 0.59 ± 0.035                        | 0.46 ± 0.030        |

**Table S13 Effects of TRO compounds on number and percentage area covered by alpha-synuclein positive aggregates in substantia nigra of Thy1-aSyn mice.** TRO40303 at the high dose (n=5 per group) had no effects on aggregate number or surface covered by aggregates (%) in the dorsolateral (dl), dorsomedial (dm), ventrolateral (vl) or ventromedial (vm) substantia nigra. TRO19622 at the high dose (n=7 per group) but not low dose (n=5 per group) significantly increased aggregate number in the dorsolateral substantia nigra, as well as the surface covered by aggregates in the dorsolateral, ventrolateral and ventromedial substantia nigra (\*p<0.05, 4x2 repeated measures ANOVA, Holm-Sidak), mean+SEM.
