# Supplementary material
Source: PubMed Central journal article supplement (PMC4135465)

Figure S1

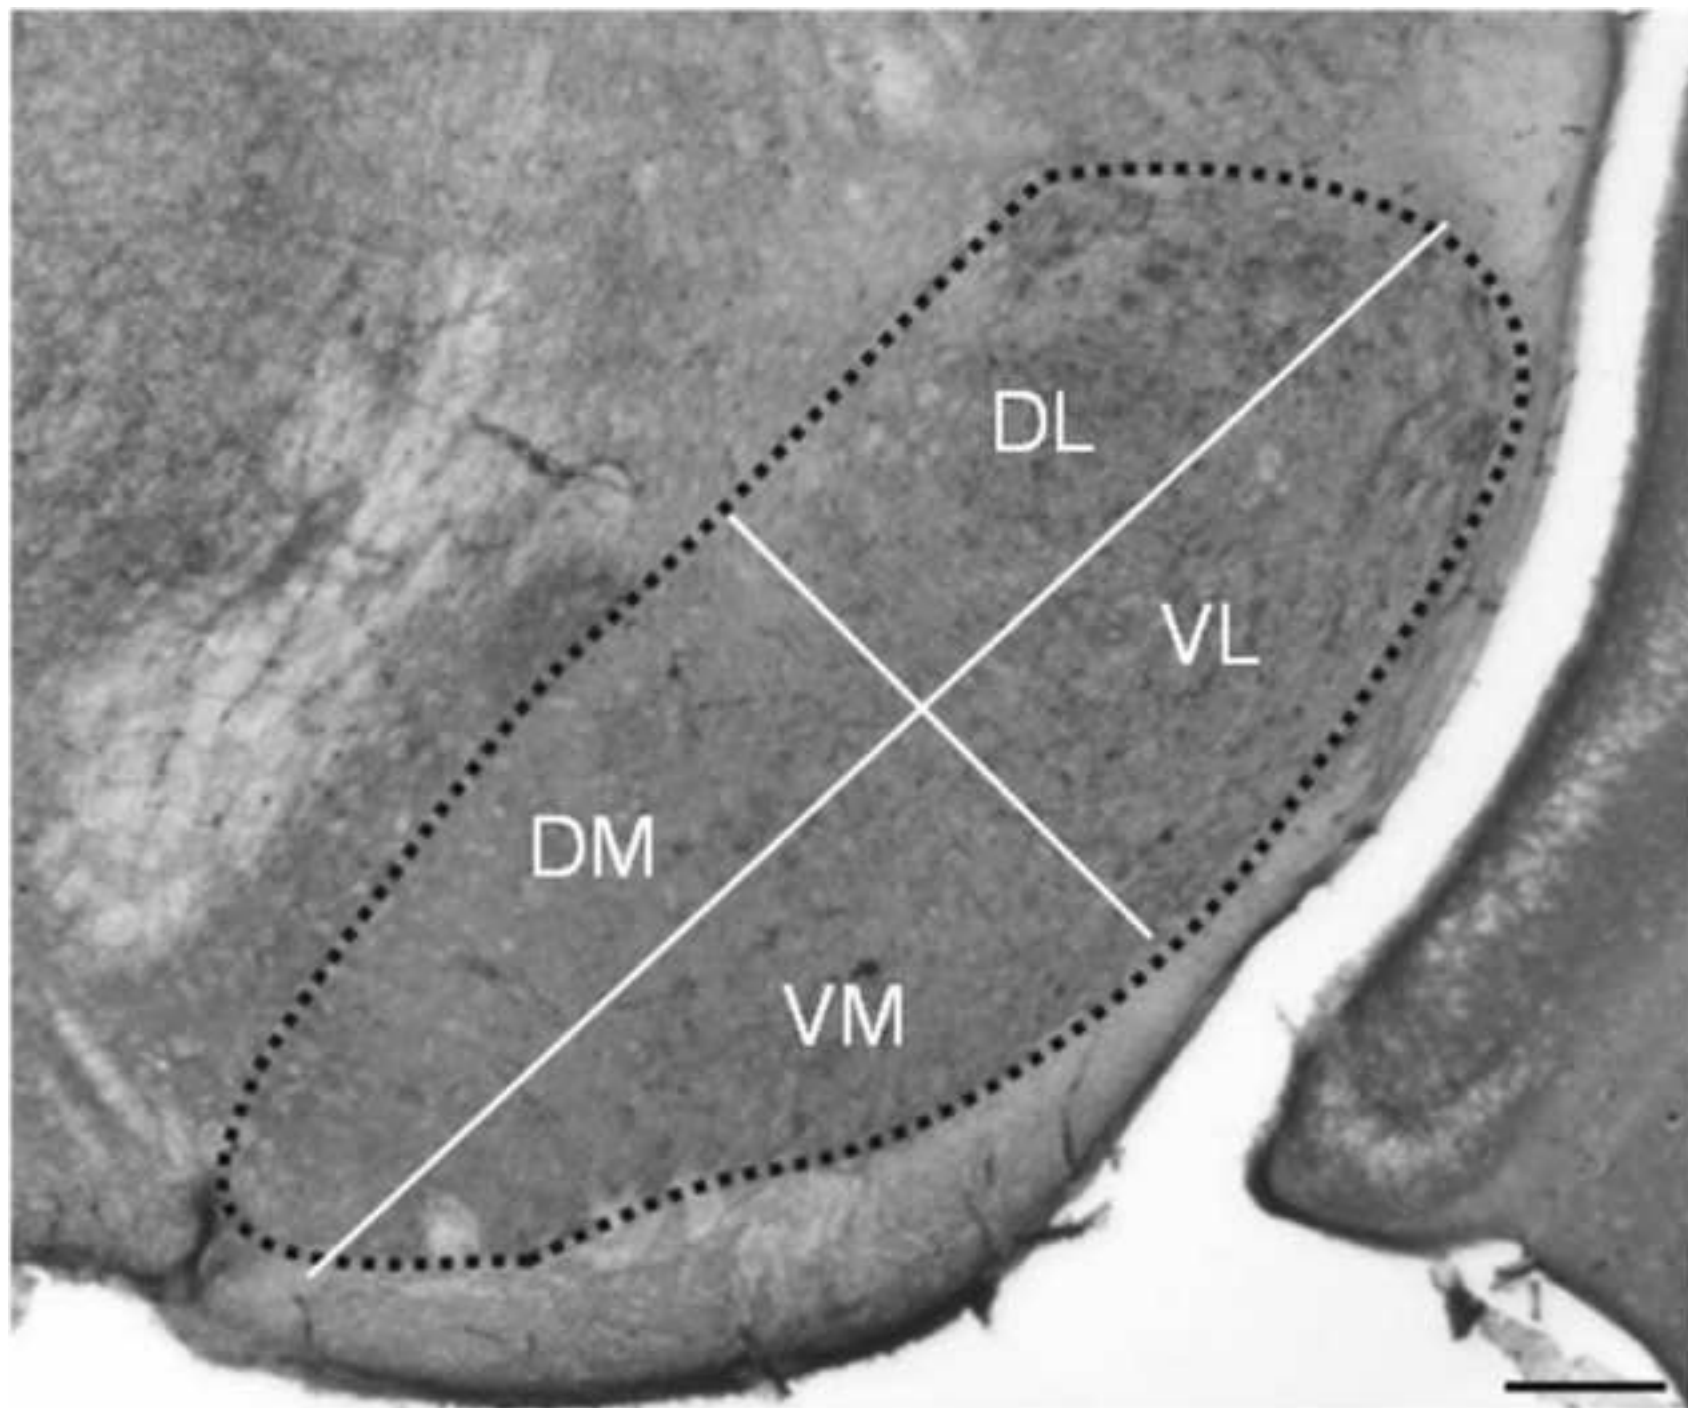

Supplement: NIHMS611930-supplement-09.pdf [file NIHMS611930-supplement-09.pdf]
